# Supplementary material for: Halogen-Based 17β-HSD1 Inhibitors: Insights from DFT, Docking, and Molecular Dynamics Simulation Studies
Source: MDPI journal article supplement (doi:10.3390/molecules27123962), 2022-06-20
Supplement: s1 [file s1]

# Halogen-Based 17 $\beta$ -HSD1 Inhibitors: Insights from DFT, Docking, and Molecular Dynamics Simulation Studies

Arulsamy Kulandaisamy <sup>1\*,†</sup>, Murugesan Panneerselvam <sup>2†</sup>, Rajadurai Vijay Solomon <sup>3,\*</sup>, Madhavan Jaccob <sup>2,\*</sup>, Jaganathan Ramakrishnan <sup>4</sup>, Kumaradhas Poomani <sup>4</sup>, Muralikannan Maruthamuthu <sup>5</sup> and Nagendran Tharmalingam <sup>6</sup>

<sup>1</sup> Department of Biotechnology, Bhupat and Jyoti Mehta School of Biosciences, Indian Institute of Technology Madras, Chennai 600 036, Tamil Nadu, India

<sup>2</sup> Department of Chemistry and Computational Chemistry Laboratory, Loyola Institute of Frontier Energy, Loyola College, Chennai 600 034, Tamil Nadu, India; panneerchem130491@gmail.com

<sup>3</sup> Department of Chemistry, Madras Christian College (Autonomous), Tambaram East, Chennai 600 045, Tamil Nadu, India

<sup>4</sup> Laboratory of BioCrystallography and Computational Molecular Biology, Department of Physics, Periyar University, Salem 636 011, Tamil Nadu, India; rjaganphy@gmail.com (J.R.); kumaradhas@yahoo.com (K.P.)

<sup>5</sup> Division of Pharmacoengineering and Molecular Pharmaceutics, Eshelman School of Pharmacy, University of North Carolina, Chapel Hill, NC 27599, USA; murali.kbiotech@gmail.com

<sup>6</sup> Division of Infectious Diseases, Rhode Island Hospital, Alpert Medical School, Brown University, Providence, RI 02903, USA; micronagu@gmail.com

\* Correspondence: bt15d045@smail.iitm.ac.in (A.K.); vjsolo@mcc.edu.in (R.V.S.); jaccob@loyolacollege.edu (M.J.)

† These authors contributed equally to this work.

**Table S1.** Quantum chemical descriptors (in eV) of newly designed inhibitors.

| Molecules                | $S$          | $\eta$      | $\mu$        | $\omega$    | $E_g$       |
|--------------------------|--------------|-------------|--------------|-------------|-------------|
| <b>Ref</b>               | <b>-0.24</b> | <b>2.12</b> | <b>-3.39</b> | <b>2.72</b> | <b>4.24</b> |
| <b>F</b> R <sub>1</sub>  | -0.24        | 2.12        | -3.49        | 2.88        | 4.24        |
| <b>F</b> R <sub>2</sub>  | -0.23        | 2.17        | -3.62        | 3.03        | 4.33        |
| <b>F</b> R <sub>3</sub>  | -0.24        | 2.12        | -3.52        | 2.92        | 4.24        |
| <b>F</b> R <sub>4</sub>  | -0.23        | 2.18        | -3.85        | 3.41        | 4.35        |
| <b>Cl</b> R <sub>1</sub> | -0.25        | 1.99        | -3.63        | 3.31        | 3.98        |
| <b>Cl</b> R <sub>2</sub> | -0.23        | 2.20        | -3.71        | 3.14        | 4.39        |
| <b>Cl</b> R <sub>3</sub> | -0.24        | 2.12        | -3.57        | 3.00        | 4.24        |
| <b>Cl</b> R <sub>4</sub> | -0.23        | 2.20        | -3.99        | 3.62        | 4.40        |
| <b>Br</b> R <sub>1</sub> | -0.29        | 1.74        | -3.87        | 4.30        | 3.47        |
| <b>Br</b> R <sub>2</sub> | -0.23        | 2.17        | -3.75        | 3.24        | 4.33        |
| <b>Br</b> R <sub>3</sub> | -0.24        | 2.12        | -3.56        | 3.00        | 4.24        |
| <b>Br</b> R <sub>4</sub> | -0.26        | 1.95        | -4.22        | 4.57        | 3.91        |
| <b>I</b> R <sub>1</sub>  | -0.32        | 1.54        | -4.06        | 5.36        | 3.08        |
| <b>I</b> R <sub>2</sub>  | -0.23        | 2.17        | -3.76        | 3.26        | 4.34        |
| <b>I</b> R <sub>3</sub>  | -0.24        | 2.11        | -3.59        | 3.05        | 4.23        |
| <b>I</b> R <sub>4</sub>  | -0.29        | 1.73        | -4.49        | 5.83        | 3.46        |

**Table S2.** The binding energy/docking score of newly designed halogen-based inhibitors against with 17 $\beta$ -HSD1 receptor.

| Molecules                | Binding free energy<br>(Kcal/mol) | Binding affinity (Ki) |
|--------------------------|-----------------------------------|-----------------------|
| <b>Reference (R)</b>     | -10.21                            | 32.98 nM              |
| <b>F</b> R <sub>1</sub>  | -10.5                             | 20.16 nM              |
| <b>F</b> R <sub>2</sub>  | -10.29                            | 28.43 nM              |
| <b>F</b> R <sub>3</sub>  | -10.26                            | 32.71 nM              |
| <b>F</b> R <sub>4</sub>  | -10.53                            | 19.05 nM              |
| <b>Cl</b> R <sub>1</sub> | -10.86                            | 10.91 nM              |
| <b>Cl</b> R <sub>2</sub> | -10.82                            | 11.73 nM              |
| <b>Cl</b> R <sub>3</sub> | -10.72                            | 13.85 nM              |
| <b>Cl</b> R <sub>4</sub> | -11.58                            | 3.27 nM               |
| <b>Br</b> R <sub>1</sub> | -11.46                            | 3.99 nM               |
| <b>Br</b> R <sub>2</sub> | -11.23                            | 5.89 nM               |
| <b>Br</b> R <sub>3</sub> | -11.01                            | 8.46 nM               |
| <b>Br</b> R <sub>4</sub> | -11.71                            | 2.59 nM               |
| <b>I</b> R <sub>1</sub>  | -11.69                            | 2.68 nM               |
| <b>I</b> R <sub>2</sub>  | -11.4                             | 4.40 nM               |
| <b>I</b> R <sub>3</sub>  | -11.29                            | 5.27 nM               |
| <b>I</b> R <sub>4</sub>  | -11.94                            | 1.78 nM               |

**Table S3.** The detailed information on hydrogen bond and  $\pi$ -bond interactions between 17 $\beta$ -HSD1 receptor and halogen-based inhibitors.

| <b>Molecules</b>       | <b>H-bond Interacting Residues</b> | <b>No of Interactions</b> | <b><math>\pi</math> -bond Interacting Residues</b>                             | <b>No of Interactions</b> |
|------------------------|------------------------------------|---------------------------|--------------------------------------------------------------------------------|---------------------------|
| <b>F<sub>R1</sub></b>  | Gly 141, Lys159, His221            | 3                         | Val143, Leu149, Cys185, Pro187, His221, Phe226                                 | 6                         |
| <b>F<sub>R2</sub></b>  | Ser142, Cys185, His221, Glu282     | 4                         | Val143, Met147, Leu149, Pro187, Val225, Phe259                                 | 9                         |
| <b>F<sub>R3</sub></b>  | Ile14, Gly15, Thr140, Gly144       | 5                         | Val143, Cys185, Pro187, Val188                                                 | 6                         |
| <b>F<sub>R4</sub></b>  | Gly186, Val188, His221             | 3                         | Val143, Met147, Leu149, Tyr155, Cys185, Pro187, Val225, Phe226                 | 11                        |
| <b>Cl<sub>R1</sub></b> | Gly141, Lys159, His221             | 3                         | Val143, Leu149, Cys185, Pro187, Phe226, Phe259                                 | 6                         |
| <b>Cl<sub>R2</sub></b> | Val188, His221                     | 2                         | Val143, Leu149, Cys185, Gly186, Pro187, Ala191, Lys195, Val225, Phe226         | 11                        |
| <b>Cl<sub>R3</sub></b> | Gly186, Val188                     | 2                         | Val143, Leu149, Pro187, Ala191, Lys195, Val225, Phe226, Phe259, Met279         | 10                        |
| <b>Cl<sub>R4</sub></b> | Gly186, Pro187, Val188             | 3                         | Val143, Leu149, Cys185, Pro187, Lys195, His221, Val225, Phe226, Phe259         | 15                        |
| <b>Br<sub>R1</sub></b> | Gly141, Asn152, Lys159, His221     | 4                         | Val143, Leu149, Tyr155, Cys185, Lys195, His221, Phe259                         | 7                         |
| <b>Br<sub>R2</sub></b> | Glu194, Tyr218, His221, Ser222     | 4                         | Val143, Gly186, Pro187, Glu194, Lys195, His221, Val225, Phe259                 | 12                        |
| <b>Br<sub>R3</sub></b> | Gly186, Val188                     | 2                         | Val143, Leu149, Pro187, Ala191, Lys195, His221, Val225, Phe226, Phe259, Met279 | 11                        |
| <b>Br<sub>R4</sub></b> | His221                             | 1                         | Val143, Tyr155, Gly186, Pro187, Lys195, His221, Val225, Phe259                 | 13                        |
| <b>I<sub>R1</sub></b>  | Gly141, Asn152, Tyr218, His221     | 4                         | Val143, Leu149, Tyr155, Cys185, Pro187, Val188, His221, Phe259                 | 10                        |
| <b>I<sub>R2</sub></b>  | Val188, His221, Ser222             | 3                         | Val143, Leu149, Cys185, Pro187, Ala191, Lys195, Val225, Phe226                 | 9                         |
| <b>I<sub>R3</sub></b>  | Gly186, Val188                     | 2                         | Val143, Leu149, Pro187, Ala191, Lys195, His221, Val225, Phe226, Phe259, Met279 | 12                        |
| <b>I<sub>R4</sub></b>  | Val188                             | 1                         | Leu149, Cys185, Pro187, Lys195, Val225, Phe226, Phe259                         | 8                         |

**Table S4.** The 17 $\beta$ -HSD1 receptor residues are involved in the halogen bond interactions with halogen-based inhibitors.

| <b>Molecules</b>       | <b>Halogen Bond Interacting Residues</b>                                       | <b>No of Interactions</b> |
|------------------------|--------------------------------------------------------------------------------|---------------------------|
| <b>F<sub>R1</sub></b>  | Leu149, Met279, Leu262, Val143                                                 | 7                         |
| <b>F<sub>R2</sub></b>  | His221, Ser222, Val225, Met279, Tyr218, Val283                                 | 9                         |
| <b>F<sub>R3</sub></b>  | Val143, Leu149, Gly144                                                         | 9                         |
| <b>F<sub>R4</sub></b>  | Val225, Val188, Ile14, Lys195, His221, Met279, Phe259, Glu194, Phe226, Tyr155  | 22                        |
| <b>Cl<sub>R1</sub></b> | Leu149, Leu262, Met279, Phe259                                                 | 8                         |
| <b>Cl<sub>R2</sub></b> | Ser142, Cys185, Tyr155                                                         | 4                         |
| <b>Cl<sub>R3</sub></b> | Met279, Phe259, His221, Leu149, Leu262, Val225                                 | 8                         |
| <b>Cl<sub>R4</sub></b> | Val225, Ile14, Val188, Lys195, His221, Phe259, Glu194, Phe226, Tyr155          | 18                        |
| <b>Br<sub>R1</sub></b> | Leu149, Met279, His221, Ser222, Tyr218, Val283                                 | 11                        |
| <b>Br<sub>R2</sub></b> | Val143, Gly186, Pro187                                                         | 6                         |
| <b>Br<sub>R3</sub></b> | Met279, Phe259, Glu282, His221, Leu262, Val225                                 | 8                         |
| <b>Br<sub>R4</sub></b> | Leu149, Val143, Met279, Tyr155, Lys159, Pro150, Tyr218, Gly186, Phe259, Pro187 | 19                        |
| <b>I<sub>R1</sub></b>  | His221, Met279, Ser222, Leu149, Tyr218, Val225, Val283                         | 10                        |
| <b>I<sub>R2</sub></b>  | Cys185, Ser142, Tyr155                                                         | 5                         |
| <b>I<sub>R3</sub></b>  | Glu282, Met279, Phe259, Val225, His221                                         | 9                         |
| <b>I<sub>R4</sub></b>  | Ala191, Leu149, Met279, Phe259, Val225, Cys185, Ser142, Tyr155                 | 13                        |
